# Supplementary material for: Dietary effects on fitness in captive-reared Hawaiian tree snails
Source: PeerJ. 2021 Sep 23;9:e11789. doi: 10.7717/peerj.11789 (PMC8466071; doi:10.7717/peerj.11789)
Supplement: Supplemental Information 1 — The three groups were fed different diets. Births and deaths were checked and recorded every 2 weeks. [file peerj-09-11789-s001.xlsx]

## Sheet: Full Data
Snail species	Date	% fungus eaten	Lab fungus fed	Eggs	Deaths	Adult	Total Pop.	Comments
A. diaphana Cage 01 Group 01	2018-11-20		0.5			10	10	Day 1 of study / veg and fungi
	2018-12-05	0	0.5	10	0	10	10	eggs removed, most were active
	2018-12-19	1	0.5	13	0	10	10	most active
	2019-01-02	1	0.5	14	0	10	10	all active
	2019-01-16	20	0.5	15	1	9	9	1 dead on bottom with mold around shell
	2019-01-30	10		15	1	8	8	most active
A. diaphana Cage 02 Group 01	2018-11-20		0.5					Day 1 of study / veg and fungi
	2018-12-05	2	0.5	21	0	10	10	eggs removed, most were active
	2018-12-19	10	0.5	20	0	10	10	5 eggs laid on fungi
	2019-01-02	5	0.5	20	0	10	10	1 active on fungi, all active
	2019-01-16	20	0.5	7	0	10	10	most were active
	2019-01-30	20		10	0	10	10	most active
A. diaphana Cage 03 Group 01	2018-11-20		0.5			10	10	Day 1 of study / veg and fungi
	2018-12-05	5	0.5	5	0	10	10	eggs removed, most were active
	2018-12-19	5	0.5	20	0	10	10	most active
	2019-01-02	1	0.5	24	0	10	10	all active
	2019-01-16	1	0.5	23	1	9	9	1 dead on leaf with mold covering it/ 4 eggs laid on branch in meristem node areas
	2019-01-30	5		24	0	9	9	most active
A. diaphana Cage 01 Group 02	2018-11-20					10	10	Day 1 of study / vegetation
	2018-12-05			0	0	10	10	few active
	2018-12-19			6	0	10	10	few active
	2019-01-02			7	0	10	10	all active
	2019-01-16			17	0	10	10	most active
	2019-01-30			11	0	10	10	few active
A. diaphana Cage 02 Group 02	2018-11-20					10	10	Day 1 of study / vegetation
	2018-12-05			0	0	10	10	few active
	2018-12-19			0	0	10	10	few active
	2019-01-02			22	0	10	10	broken eggshells under cag on tray, all active, eggs seem smaller than normal
	2019-01-16			12	0	10	10	most active
	2019-01-30			18	0	10	10	most active
A. diaphana Cage 03 Group 03	2018-11-20							Day 1 of study / vegetation
	2018-12-05			1	0	10	10	removed egg, few active
	2018-12-19			4	0	10	10	few active
	2019-01-02			2	1	9	9	most active
	2019-01-16			0	0	9	9	few active, cage was dry
	2019-01-30			2	0	9	9	few active
A. diaphana Cage 01 Group 03	2018-11-20		0.5					Day 1 of study / fungi. The half of fungus was cut in half again for two pieces
	2018-12-05	5	0.5	0	0	10	10	none were active. 1 of the 1/4 fungus piece was dry and curled
	2018-12-19	19	1	0	0	10	10	Increased food to prevent drying out. One piece cut in half. All inactive
	2019-01-02	3	1	2	0	10	10	Active?
	2019-01-16	10	1	0	0	10	10	all inactive on roof
	2019-01-30	30		0	0	10	10	all inactive on roof
A. diaphana Cage 02 Group 03	2018-11-20		0.5					Day 1 of study / fungi. The half of fungus was cut in half again for two pieces
	2018-12-05	5	0.5	0	0	10	10	all inactive
	2018-12-19	20	1	0	0	10	10	Increased food to prevent drying out. One piece cut in half. All inactive
	2019-01-02	10	1	3	0	10	10	all inactive on roof
	2019-01-16	5	1	0	0	10	10	all inactive on roof, half of food dried out
	2019-01-30	50		3	0	10	10	all inactive on roof
A. diaphana Cage 03 Group 03	2018-11-20		0.5					Day 1 of study / fungi. The half of fungus was cut in half again for two pieces
	2018-12-05	8	0.5	0	0	10	10	all inactive
	2018-12-19	15	1	0	0	10	10	Increased food to prevent drying out. One piece cut in half. All inactive
	2019-01-02	0	1	0	0	10	10	all inactive on roof
	2019-01-16	1	1	0	0	10	10	all inactive
	2019-01-30	40		0	0	10	10	all inactive on roof

## Sheet: eggs
1: Vegetation & Fungi	2: Vegetation	3: Fungi
eggs	eggs	eggs
331	200	19
1-61
2-38
2019-03-03

## Sheet: Deaths
Group 1	Group 2	Group 3
deaths	deaths	deaths
5	1	0

## Sheet: Hatch success
Date Eggs Found	Date hatch found	Total Hatched alive	Total Hatched Dead	Total Hatched	Comments
Group 01
2019-12-19	2019-02-13	1	0	1
2019-12-19	2019-02-27	24	0	24
2019-01-02	2019-02-27	0	5	5	Mites and found on eggs and hatched dead snails, discarded all
2019-12-05	2019-02-27	5	0	5
2019-12-19	2019-03-13	20	0	20
12/5/19+1/2/19	2019-03-21	11	0	11
Group 02
2019-12-05	2019-02-27	1	1	0	Mites found discarded all
2019-12-19	2019-02-13	5	0	5
2019-01-16	2019-03-13	12	0	12
1/16/2019+12/19/19	2019-03-21	21	0	21
Group 03
2019-01-02	2019-03-13	3	0	3
